# Supplementary material for: Evolution of vacuolar proton pyrophosphatase domains and volutin granules: clues into the early evolutionary origin of the acidocalcisome
Source: Springer Nature journal article supplement (doi:10.1186/1745-6150-6-50), 2011-01-01

Archaea (17 species)

Bacteria (231 species)

Eukarya (31 species)

State of PF03030 on terminal branches

Single copy —

Two copies ■

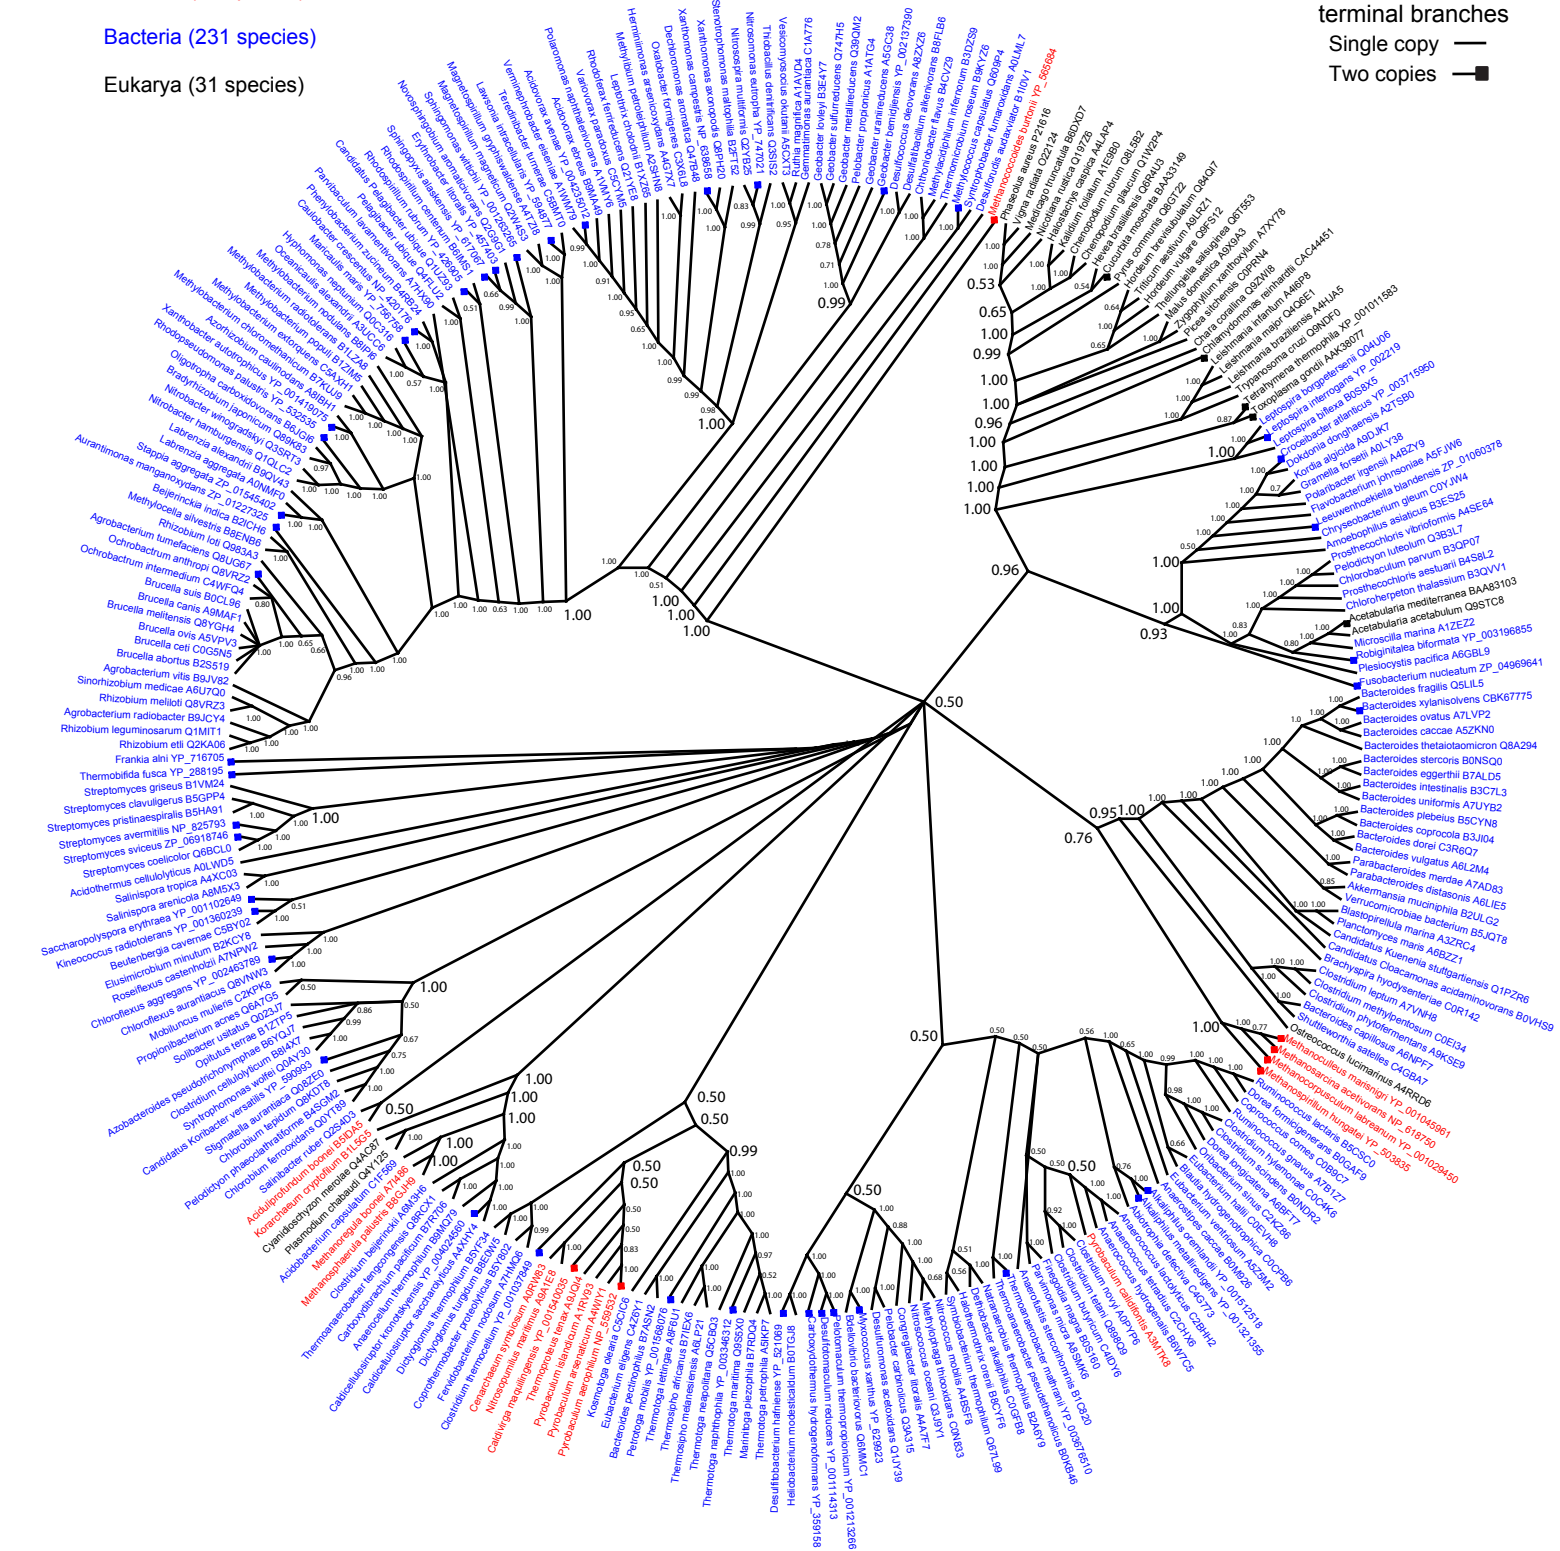

Supplement: 13062_2011_299_MOESM4_ESM.pdf [file 13062_2011_299_MOESM4_ESM.pdf]
