# Supplementary material for: Evolution of vacuolar proton pyrophosphatase domains and volutin granules: clues into the early evolutionary origin of the acidocalcisome
Source: Springer Nature journal article supplement (doi:10.1186/1745-6150-6-50), 2011-01-01
Supplement: Additional file 2 [file 1745-6150-6-50-s2.pdf]

**Additional File 2. Taxa and accession numbers used in the phylogenetic analyses**

| <b>TAXA</b>                              | <b>Accession numbers</b> |
|------------------------------------------|--------------------------|
| <i>Rhizobium etli</i>                    | Q2KA06                   |
| <i>Rhizobium leguminosarum</i>           | Q1MIT1                   |
| <i>Agrobacterium radiobacter</i>         | B9JCY4                   |
| <i>Agrobacterium tumefaciens</i>         | Q8UG67                   |
| <i>Rhizobium meliloti</i>                | Q8VRZ3                   |
| <i>Sinorhizobium medicae</i>             | A6U7Q0                   |
| <i>Agrobacterium vitis</i>               | B9JV82                   |
| <i>Brucella abortus</i>                  | B2S519                   |
| <i>Brucella canis</i>                    | A9MAF1                   |
| <i>Brucella ceti</i>                     | C0G5N5                   |
| <i>Brucella melitensis</i>               | Q8YGH4                   |
| <i>Brucella suis</i>                     | B0CL96                   |
| <i>Brucella ovis</i>                     | A5VPV3                   |
| <i>Ochrobactrum intermedium</i>          | C4WFQ4                   |
| <i>Ochrobactrum anthropi</i>             | Q8VRZ2                   |
| <i>Rhizobium loti</i>                    | Q983A3                   |
| <i>Methylocella silvestris</i>           | B8ENB6                   |
| <i>Beijerinckia indica</i>               | B2ICH6                   |
| <i>Aurantimonas manganoxydans</i>        | ZP_01227325              |
| <i>Stappia aggregata</i>                 | ZP_01545402              |
| <i>Labrenzia aggregata</i>               | A0NMF0                   |
| <i>Labrenzia alexandrii</i>              | B9QV43                   |
| <i>Bradyrhizobium japonicum</i>          | Q89K83                   |
| <i>Oligotropha carboxidovorans</i>       | B6JGI6                   |
| <i>Nitrobacter hamburgensis</i>          | Q1QLC2                   |
| <i>Nitrobacter winogradskyi</i>          | Q3SRT3                   |
| <i>Rhodopseudomonas palustris</i>        | YP_532535                |
| <i>Xanthobacter autotrophicus</i>        | YP_001419075             |
| <i>Azorhizobium caulinodans</i>          | A8IBH1                   |
| <i>Methylobacterium chloromethanicum</i> | B7KUJ9                   |
| <i>Methylobacterium extorquens</i>       | C5AXH1                   |
| <i>Methylobacterium populi</i>           | B1ZIM5                   |
| <i>Methylobacterium radiotolerans</i>    | B1LZA8                   |
| <i>Methylobacterium nodulans</i>         | B8IPI6                   |
| <i>Caulobacter crescentus</i>            | NP_420176                |
| <i>Phenylobacterium zucineum</i>         | B4RB24                   |
| <i>Maricaulis maris</i>                  | YP_756758                |

|                                         |              |
|-----------------------------------------|--------------|
| <i>Oceanicaulis alexandrii</i>          | A3UCC6       |
| <i>Hyphomonas neptunium</i>             | Q0C316       |
| <i>Parvibaculum lavamentivorans</i>     | A7HX90       |
| <i>Pelagibacter ubique</i>              | Q4FLU2       |
| <i>Candidatus Pelagibacter</i>          | Q1UZ93       |
| <i>Rhodospirillum rubrum</i>            | YP_426905    |
| <i>Rhodospirillum centenum</i>          | B6IMS1       |
| <i>Novosphingobium aromaticivorans</i>  | Q2G9G1       |
| <i>Erythrobacter litoralis</i>          | YP_457403    |
| <i>Sphingopyxis alaskensis</i>          | YP_617067    |
| <i>Sphingomonas wittichii</i>           | YP_001263265 |
| <i>Magnetospirillum magneticum</i>      | Q2W4S3       |
| <i>Magnetospirillum gryphiswaldense</i> | A4TZI8       |
| <i>Lawsonia intracellularis</i>         | YP_594877    |
| <i>Teredinibacter turnerae</i>          | C5BMT0       |
| <i>Verminephrobacter eiseniae</i>       | A1WM79       |
| <i>Acidovorax avenae</i>                | YP_004235012 |
| <i>Acidovorax ebreus</i>                | B9MA49       |
| <i>Polaromonas naphthalenivorans</i>    | A1VMY6       |
| <i>Variovorax paradoxus</i>             | C5CYM5       |
| <i>Leptothrix cholodnii</i>             | B1XZ65       |
| <i>Methylibium petroleiphilum</i>       | A2SHN8       |
| <i>Rhodoferax ferrireducens</i>         | Q21YE8       |
| <i>Herminiimonas arsenicoxydans</i>     | A4G7X7       |
| <i>Oxalobacter formigenes</i>           | C3X6L8       |
| <i>Xanthomonas campestris</i>           | NP_638658    |
| <i>Xanthomonas axonopodis</i>           | Q8PH20       |
| <i>Stenotrophomonas maltophilia</i>     | B2FT52       |
| <i>Vesicomysocius okutanii</i>          | A5CXT3       |
| <i>Ruthia magnifica</i>                 | A1AVD4       |
| <i>Gemmatimonas aurantiaca</i>          | C1A776       |
| <i>Thiobacillus denitrificans</i>       | Q3SIS2       |
| <i>Nitrospira multififormis</i>         | Q2YB25       |
| <i>Nitrosomonas eutropha</i>            | YP_747021    |
| <i>Geobacter lovleyi</i>                | B3E4Y7       |
| <i>Geobacter sulfurreducens</i>         | Q747H5       |
| <i>Geobacter metallireducens</i>        | Q39QM2       |
| <i>Geobacter bemidjensis</i>            | YP_002137390 |
| <i>Geobacter uraniireducens</i>         | A5GC38       |
| <i>Pelobacter propionicus</i>           | A1ATG4       |
| <i>Desulfococcus oleovorans</i>         | A8ZXZ6       |
| <i>Desulfatibacillum alkenivorans</i>   | B8FLB6       |
| <i>Chthoniobacter flavus</i>            | B4CVZ9       |
| <i>Methylacidiphilum infernorum</i>     | B3DZS9       |
| <i>Thermomicrobium roseum</i>           | B9KYZ6       |
| <i>Methylococcus capsulatus</i>         | Q609P4       |

|                                      |              |
|--------------------------------------|--------------|
| <i>Syntrophobacter fumaroxidans</i>  | A0LML7       |
| <i>Desulforudis audaxviator</i>      | B1I0V1       |
| <i>Methanococcoides burtonii</i>     | YP_565684    |
| <i>Kordia algicida</i>               | A9DJK7       |
| <i>Gramella forsetii</i>             | A0LY38       |
| <i>Dokdonia donghaensis</i>          | A2TSB0       |
| <i>Croceibacter atlanticus</i>       | YP_003715950 |
| <i>Polaribacter irgensii</i>         | A4BZY9       |
| <i>Flavobacterium johnsoniae</i>     | A5FJW6       |
| <i>Leeuwenhoekiella blandensis</i>   | ZP_01060378  |
| <i>Amoebophilus asiaticus</i>        | B3ES25       |
| <i>Chryseobacterium gleum</i>        | C0YJW4       |
| <i>Microscilla marina</i>            | A1ZEZ2       |
| <i>Acetabularia mediterranea</i>     | BAA83103     |
| <i>Acetabularia acetabulum</i>       | Q9STC8       |
| <i>Robiginitalea biformata</i>       | YP_003196855 |
| <i>Prosthecochloris vibriiformis</i> | A4SE64       |
| <i>Elodictyon luteolum</i>           | Q3B3L7       |
| <i>Chlorobaculum parvum</i>          | B3QP07       |
| <i>Prosthecochloris aestuarii</i>    | B4S8L2       |
| <i>Chloroherpeton thalassium</i>     | B3QVV1       |
| <i>Plesiocystis pacifica</i>         | A6GBL9       |
| <i>Hordeum brevisubulatum</i>        | Q84QI7       |
| <i>Triticum aestivum</i>             | A9LRZ1       |
| <i>Hordeum vulgare</i>               | Q9FS12       |
| <i>Chenopodium rubrum</i>            | Q8L5B2       |
| <i>Chenopodium glaucum</i>           | Q1W2P4       |
| <i>Halostachys caspica</i>           | A4LAP4       |
| <i>Kalidium foliatum</i>             | A1E9B0       |
| <i>Phaseolus aureus</i>              | P21616       |
| <i>Vigna radiata</i>                 | O22124       |
| <i>Medicago truncatula</i>           | B6DXD7       |
| <i>Pyrus communis</i>                | Q8GT22       |
| <i>Cucurbita moschata</i>            | BAA33149     |
| <i>Hevea brasiliensis</i>            | Q6R4U3       |
| <i>Nicotiana rustica</i>             | Q197Z6       |
| <i>Thellungiella salsuginea</i>      | Q6T553       |
| <i>Malus domestica</i>               | A9X9A3       |
| <i>Zygophyllum xanthoxylum</i>       | A7XY78       |
| <i>Picea sitchensis</i>              | C0PRN4       |
| <i>Chara corallina</i>               | Q9ZWI8       |
| <i>Chlamydomonas reinhardtii</i>     | CAC44451     |
| <i>Leishmania infantum</i>           | A4I6P8       |
| <i>Leishmania major</i>              | Q4Q6E1       |
| <i>Leishmania braziliensis</i>       | A4HJA5       |
| <i>Trypanosoma cruzi</i>             | Q9NDF0       |

|                                     |              |
|-------------------------------------|--------------|
| <i>Tetrahymena thermophila</i>      | XP_001011583 |
| <i>Toxoplasma gondii</i>            | AAK38077     |
| <i>Leptospira borgpetersenii</i>    | Q04U06       |
| <i>Leptospira interrogans</i>       | YP_002219    |
| <i>Leptospira biflexa</i>           | B0S8X5       |
| <i>Salinibacter ruber</i>           | Q2S4D3       |
| <i>Aciduliprofundum boonei</i>      | B5IDA5       |
| <i>Bacteroides ovatus</i>           | A7LVP2       |
| <i>Bacteroides caccae</i>           | A5ZKN0       |
| <i>Bacteroides fragilis</i>         | Q5LIL5       |
| <i>Bacteroides xylanisolvens</i>    | CBK67775     |
| <i>Bacteroides thetaiotaomicron</i> | Q8A294       |
| <i>Bacteroides intestinalis</i>     | B3C7L3       |
| <i>Bacteroides uniformis</i>        | A7UYB2       |
| <i>Bacteroides stercoris</i>        | B0NSQ0       |
| <i>Bacteroides eggerthii</i>        | B7ALD5       |
| <i>Bacteroides dorei</i>            | C3R6Q7       |
| <i>Bacteroides vulgatus</i>         | A6L2M4       |
| <i>Bacteroides plebeius</i>         | B5CYN8       |
| <i>Bacteroides coprocola</i>        | B3JI04       |
| <i>Parabacteroides merdae</i>       | A7AD83       |
| <i>Parabacteroides distasonis</i>   | A6LIE5       |
| <i>Akkermansia muciniphila</i>      | B2ULG2       |
| <i>Verrucomicrobiae bacterium</i>   | B5JQT8       |
| <i>Blastopirellula marina</i>       | A3ZRC4       |
| <i>Planctomyces maris</i>           | A6BZZ1       |
| <i>Candidatus Kuenenia</i>          | Q1PZR6       |
| <i>Candidatus Cloacamonas</i>       | B0VHS9       |
| <i>Brachyspira hyodysenteriae</i>   | C0R142       |
| <i>Clostridium phytofermentans</i>  | A9KSE9       |
| <i>Clostridium leptum</i>           | A7VNH8       |
| <i>Clostridium methylpentosum</i>   | C0EI34       |
| <i>Bacteroides capillosus</i>       | A6NPF7       |
| <i>Shuttleworthia satelles</i>      | C4GBA7       |
| <i>Thermotoga petrophila</i>        | A5IKP7       |
| <i>Marinitoga piezophila</i>        | B7RDQ4       |
| <i>Thermotoga naphthophila</i>      | YP_003346312 |
| <i>Thermotoga maritima</i>          | Q9S5X0       |
| <i>Thermotoga neapolitana</i>       | Q5CBQ3       |
| <i>Thermosipho melanesiensis</i>    | A6LP21       |
| <i>Thermosipho africanus</i>        | B7IEX6       |
| <i>Thermotoga lettingae</i>         | A8F6U1       |
| <i>Petrotoga mobilis</i>            | YP_001568076 |
| <i>Bacteroides pectinophilus</i>    | B7ASN2       |
| <i>Eubacterium eligens</i>          | C4Z6Y1       |
| <i>Kosmotoga olearia</i>            | C5CIC6       |

|                                           |              |
|-------------------------------------------|--------------|
| <i>Dictyoglomus turgidum</i>              | B8E0W5       |
| <i>Dictyoglomus thermophilum</i>          | B5YF34       |
| <i>Fervidobacterium nodosum</i>           | A7HMQ6       |
| <i>Coprothermobacter proteolyticus</i>    | B5Y802       |
| <i>Pyrobaculum aerophilum</i>             | NP_559532    |
| <i>Pyrobaculum arsenaticum</i>            | A4WIY1       |
| <i>Pyrobaculum islandicum</i>             | A1RV93       |
| <i>Pyrobaculum calidifontis</i>           | A3MTK8       |
| <i>Thermoproteus tenax</i>                | A9JQI4       |
| <i>Caldivirga maquilingensis</i>          | YP_001540035 |
| <i>Nitrosopumilus maritimus</i>           | A9A1E8       |
| <i>Cenarchaeum symbiosum</i>              | A0RW83       |
| <i>Clostridium thermocellum</i>           | YP_001037849 |
| <i>Nitrosococcus oceani</i>               | Q3J9Y1       |
| <i>Nitrococcus mobilis</i>                | A4BSF8       |
| <i>Methylophaga thiooxidans</i>           | C0N833       |
| <i>Congregibacter litoralis</i>           | A4A7F7       |
| <i>Pelobacter carbinolicus</i>            | Q3A315       |
| <i>Desulfuromonas acetoxidans</i>         | Q1JY39       |
| <i>Myxococcus xanthus</i>                 | YP_629923    |
| <i>Bdellovibrio bacteriovorus</i>         | Q6MMC1       |
| <i>Anaerococcus lactolyticus</i>          | C2BHH2       |
| <i>Anaerococcus tetradius</i>             | C2CHX6       |
| <i>Anaerococcus hydrogenalis</i>          | B6W7C5       |
| <i>Abiotrophia defectiva</i>              | C4G773       |
| <i>Clostridium novyi</i>                  | A0PYP6       |
| <i>Clostridium tetani</i>                 | Q898Q9       |
| <i>Clostridium butyricum</i>              | C4IDY6       |
| <i>Alkaliphilus oremlandii</i>            | YP_001512518 |
| <i>Alkaliphilus metalliredigens</i>       | YP_001321355 |
| <i>Ruminococcus lactaris</i>              | B5CSC0       |
| <i>Dorea formicigenerans</i>              | B0GAF9       |
| <i>Coprococcus comes</i>                  | C0B9C7       |
| <i>Ruminococcus gnavus</i>                | A7B1Z7       |
| <i>Clostridium hylemonae</i>              | C0C4K6       |
| <i>Clostridium scindens</i>               | B0NDR2       |
| <i>Dorea longicatena</i>                  | A6BFT7       |
| <i>Eubacterium hallii</i>                 | C0EVH8       |
| <i>Blautia hydrogenotrophica</i>          | C0CPB6       |
| <i>Oribacterium sinus</i>                 | C2KZ86       |
| <i>Pelotomaculum thermopropionicum</i>    | YP_001213266 |
| <i>Desulfotomaculum reducens</i>          | YP_001114313 |
| <i>Carboxydotherrmus hydrogenoformans</i> | YP_359158    |
| <i>Heliobacterium modesticaldum</i>       | B0TGJ8       |
| <i>Desulfitobacterium hafniense</i>       | YP_521069    |
| <i>Natranaerobius thermophilus</i>        | B2A6Y9       |

|                                             |              |
|---------------------------------------------|--------------|
| <i>Dethiobacter alkaliphilus</i>            | C0GFB8       |
| <i>Halothermothrix orenii</i>               | B8CYF6       |
| <i>Methanoculleus marisnigri</i>            | YP_001045961 |
| <i>Methanosarcina acetivorans</i>           | NP_618750    |
| <i>Methanocorpusculum labreanum</i>         | YP_001029450 |
| <i>Methanospirillum hungatei</i>            | YP_503835    |
| <i>Thermoanaerobacter mathranii</i>         | YP_003676510 |
| <i>Thermoanaerobacter pseudethanolicus</i>  | B0KB46       |
| <i>Anaerofustis stercorihominis</i>         | B1C820       |
| <i>Finegoldia magna</i>                     | B0S160       |
| <i>Parvimonas micra</i>                     | A8SMK6       |
| <i>Ostreococcus lucimarinus</i>             | A4RRD6       |
| <i>Symbiobacterium thermophilum</i>         | Q67L99       |
| <i>Eubacterium ventriosum</i>               | A5Z5M2       |
| <i>Anaerostipes caccae</i>                  | B0M926       |
| <i>Fusobacterium nucleatum</i>              | ZP_04969641  |
| <i>Caldicellulosiruptor saccharolyticus</i> | A4XHY4       |
| <i>Caldicellulosiruptor kronotskyensis</i>  | YP_004024560 |
| <i>Anaerocellum thermophilum</i>            | B9MQ79       |
| <i>Carboxydibrachium pacificum</i>          | B7R706       |
| <i>Thermoanaerobacter tengcongensis</i>     | Q8RCX1       |
| <i>Clostridium beijerinckii</i>             | A6M3H6       |
| <i>Methanosphaerula palustris</i>           | B8GJH9       |
| <i>Methanoregula boonei</i>                 | A7I486       |
| <i>Acidobacterium capsulatum</i>            | C1F569       |
| <i>Plasmodium chabaudi</i>                  | Q4Y125       |
| <i>Cyanidioschyzon merolae</i>              | Q4AC87       |
| <i>Korarchaeum cryptofilum</i>              | B1L5G5       |
| <i>Chloroflexus aurantiacus</i>             | Q8VNW3       |
| <i>Chloroflexus aggregans</i>               | YP_002463789 |
| <i>Roseiflexus castenholzii</i>             | A7NPW2       |
| <i>Elusimicrobium minutum</i>               | B2KCY8       |
| <i>Syntrophomonas wolfei</i>                | Q0AY30       |
| <i>Clostridium cellulolyticum</i>           | B8I4X7       |
| <i>Azobacteroides pseudotrichonymphae</i>   | B6YQJ7       |
| <i>Opitutus terrae</i>                      | B1ZTP5       |
| <i>Candidatus Koribacter versatilis</i>     | YP_590993    |
| <i>Solibacter usitatus</i>                  | Q023J7       |
| <i>Chlorobium ferrooxidans</i>              | Q0YT89       |
| <i>Pelodictyon phaeoclathratiforme</i>      | B4SGM2       |
| <i>Chlorobium tepidum</i>                   | Q8KDT8       |
| <i>Stigmatella aurantiaca</i>               | Q08ZE0       |
| <i>Mobiluncus mulieris</i>                  | C2KPK8       |
| <i>Propionibacterium acnes</i>              | Q6A7G5       |
| <i>Beutenbergia cavernae</i>                | C5BY02       |
| <i>Kineococcus radiotolerans</i>            | YP_001360239 |

|                                       |              |
|---------------------------------------|--------------|
| <i>Saccharopolyspora erythraea</i>    | YP_001102649 |
| <i>Salinispora arenicola</i>          | A8M5X3       |
| <i>Salinispora tropica</i>            | A4XC03       |
| <i>Acidothermus cellulolyticus</i>    | A0LWD5       |
| <i>Streptomyces coelicolor</i>        | Q6BCL0       |
| <i>Streptomyces sviveus</i>           | ZP_06918746  |
| <i>Streptomyces avermitilis</i>       | NP_825793    |
| <i>Streptomyces pristinaespiralis</i> | B5HA91       |
| <i>Streptomyces clavuligerus</i>      | B5GPP4       |
| <i>Streptomyces griseus</i>           | B1VM24       |
| <i>Thermobifida fusca</i>             | YP_288195    |
| <i>Frankia alni</i>                   | YP_716705    |
