# Supplementary figures and images for: Evolution of vacuolar proton pyrophosphatase domains and volutin granules: clues into the early evolutionary origin of the acidocalcisome
Source: Springer Nature journal article supplement (doi:10.1186/1745-6150-6-50), 2011-01-01

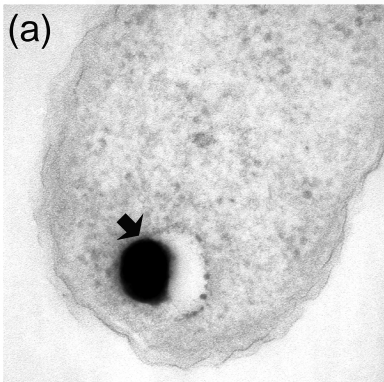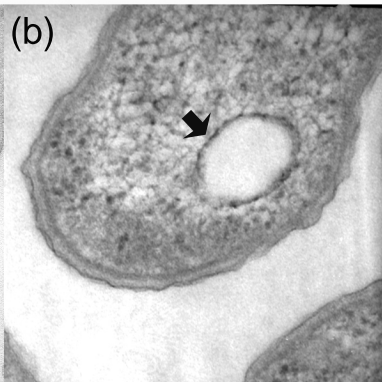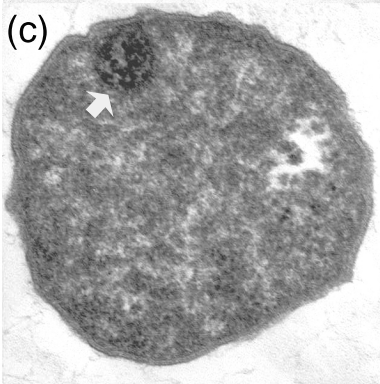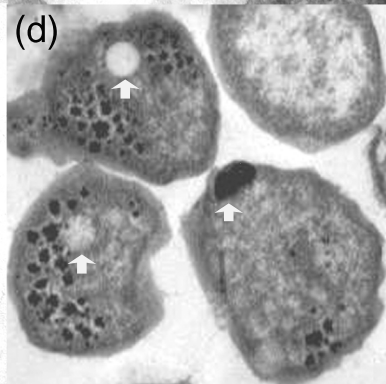

Supplement: 13062_2011_299_MOESM3_ESM.pdf [file 13062_2011_299_MOESM3_ESM.pdf]

**A**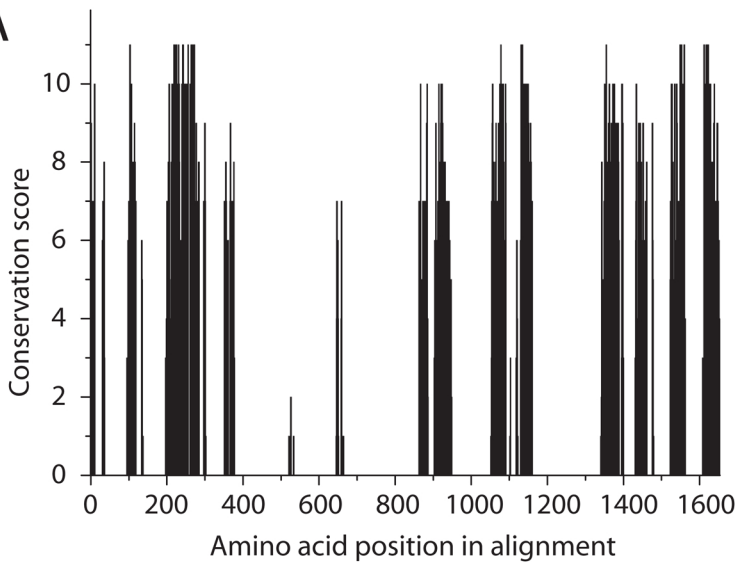**B**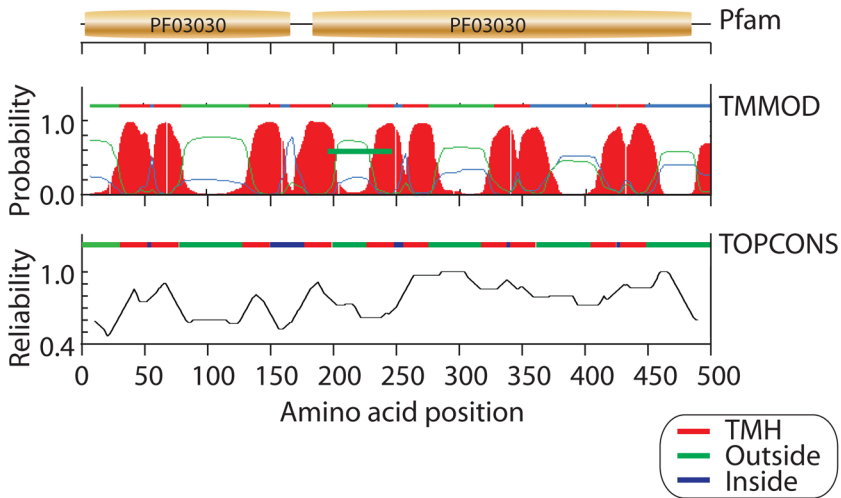

Supplement: 13062_2011_299_MOESM5_ESM.pdf [file 13062_2011_299_MOESM5_ESM.pdf]
